# Supplementary material
Source: PubMed Central journal article supplement (PMC10330041)
Supplement: NIHMS1879108-supplement-Supplemental_Data_File___doc___tif__pdf__etc__.pdf [file NIHMS1879108-supplement-Supplemental_Data_File___doc___tif__pdf__etc__.pdf]

## Table of Contents

Supplemental Figure A – page 2

Supplemental Table B – page 3

Supplemental Table C – page 4

Supplemental Table D – page 6

Supplemental Figure A: Directed acyclic graph (DAG) of patient group with outcome

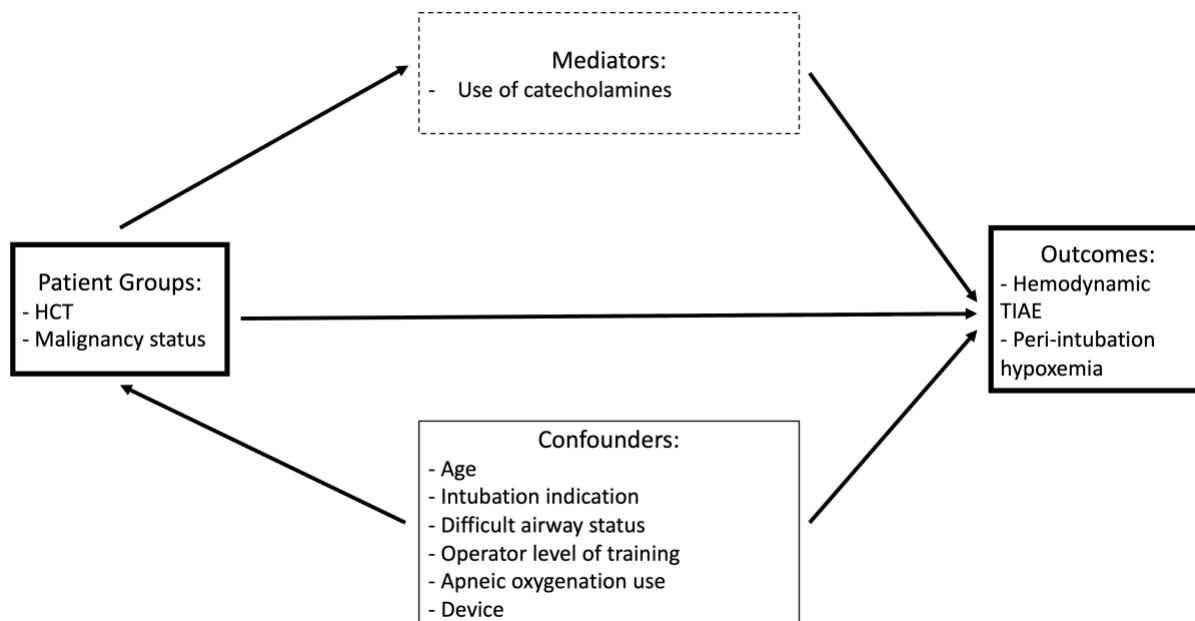

Supplemental Table B. Adverse hemodynamic tracheal intubation associated events and peri-intubation hypoxemia across the three groups

| <b>Outcome</b>                                                           | <b>All Patients<br/>(n=1931)</b> | <b>Without<br/>Malignancy<br/>No HCT<br/>(n=1520)</b> | <b>With Malignancy<br/>No HCT<br/>(n=319)</b> | <b>HCT<br/>(n=92)</b> |
|--------------------------------------------------------------------------|----------------------------------|-------------------------------------------------------|-----------------------------------------------|-----------------------|
| <b>Hemodynamic<br/>TIAE or<br/>hypoxemia<br/>(composite<br/>outcome)</b> | 277 (14%)                        | 229 (15%)                                             | 33 (10%)                                      | 15 (16%)              |
| <b>Hemodynamic<br/>TIAE</b>                                              | 49 (3%)                          | 43 (3%)                                               | 4 (1%)                                        | 2 (2%)                |
| Cardiac arrest                                                           | 8 (<1%)                          | 8 (<1%)                                               | 0 (0%)                                        | 0 (0%)                |
| Hypotension                                                              | 36 (2%)                          | 32 (2%)                                               | 1 (<1%)                                       | 2 (2%)                |
| Hypertension                                                             | 1 (<1%)                          | 0 (0%)                                                | 1 (<1%)                                       | 0 (0%)                |
| Dysrhythmia                                                              | 11 (<1%)                         | 10 (<1%)                                              | 1 (<1%)                                       | 0 (0%)                |
| <b>Hypoxemia<br/>(SpO<sub>2</sub>&lt;80%)</b>                            | 244 (13%)                        | 199 (13%)                                             | 32 (10%)                                      | 13 (14%)              |
| Lowest SpO <sub>2</sub><br>during<br>intubation,<br>median (IQR)         | 99 (91-100)                      | 98 (90-100)                                           | 99 (95-100)                                   | 98 (82-100)           |

HCT: hematopoietic stem cell transplant; TIAE: tracheal intubation associated events; SpO<sub>2</sub>: oxyhemoglobin saturation; IQR: Interquartile range; N/A: not applicable

Supplemental Table C. Characteristics of HCT patients who are or are not treated with bi-level positive airway pressure (BLPAP) ventilation prior to intubation

| Characteristic                                   | All HCT patients<br>N=92 | Without BLPAP<br>n=57 | With BLPAP<br>n=35 |
|--------------------------------------------------|--------------------------|-----------------------|--------------------|
| Age category                                     |                          |                       |                    |
| < 1 year                                         | 7 (8%)                   | 5 (9%)                | 2 (6%)             |
| 1-7 year                                         | 36 (39%)                 | 27 (47%)              | 9 (26%)            |
| 8-17 year                                        | 39 (42%)                 | 21 (37%)              | 18 (51%)           |
| ≥18 year                                         | 10 (11%)                 | 4 (7%)                | 6 (17%)            |
| Male sex (count, %)                              | 53 (58%)                 | 29 (51%)              | 24 (69%)           |
| Weight in kg, median (IQR)                       | 25.0 (12.8-54.7)         | 20.1 (11.1-49.8)      | 48.9 (22.9-66.1)   |
| Difficult airway features                        | 21 (23%)                 | 14 (25%)              | 7 (20%)            |
| Allogeneic transplant                            | 82 (89%)                 | 50 (88%)              | 32 (91%)           |
| Transplant source                                |                          |                       |                    |
| PSCT                                             | 38 (46%)                 | 21 (42%)              | 17 (53%)           |
| BM                                               | 36 (44%)                 | 24 (48%)              | 12 (38%)           |
| UCB                                              | 8 (10%)                  | 5 (10%)               | 3 (9%)             |
| GVHD                                             | 28 (34%)                 | 15 (30%)              | 13 (41%)           |
| Organ system affected by GVHD <sup>a</sup>       |                          |                       |                    |
| Skin                                             | 22 (24%)                 | 13 (23%)              | 9 (26%)            |
| Liver                                            | 5 (5%)                   | 1 (2%)                | 4 (11%)            |
| Gut                                              | 15 (16%)                 | 9 (16%)               | 6 (17%)            |
| Other                                            | 4 (4%)                   | 1 (2%)                | 3 (9%)             |
| Days from transplant to intubation, median (IQR) | 101 (36-367)             | 103 (43-351)          | 83 (23-512)        |
| Provider type                                    |                          |                       |                    |
| PCCM Attending                                   | 5 (5%)                   | 4 (7%)                | 1 (3%)             |
| PCCM/EM fellow                                   | 76 (83%)                 | 45 (79%)              | 31 (89%)           |
| Peds/EM resident                                 | 1 (1%)                   | 1 (2%)                | 0 (0%)             |
| APP                                              | 5 (5%)                   | 3 (5%)                | 2 (6%)             |
| Subspecialist/Other                              | 5 (5%)                   | 4 (7%)                | 1 (3%)             |
| Device                                           |                          |                       |                    |
| Direct laryngoscope                              | 44 (48%)                 | 32 (56%)              | 12 (34%)           |
| Video laryngoscope                               | 47 (51%)                 | 24 (42%)              | 23 (66%)           |
| LMA/FO/Other                                     | 1 (1%)                   | 1 (2%)                | 0 (0%)             |

|                                                             |          |          |          |
|-------------------------------------------------------------|----------|----------|----------|
| Number of attempts, median (IQR)                            | 1 (1-1)  | 1 (1-1)  | 1 (1-1)  |
| Use of apneic oxygenation                                   | 42 (46%) | 21 (37%) | 21 (60%) |
| Indication for intubation <sup>b</sup>                      |          |          |          |
| Respiratory                                                 | 61 (66%) | 29 (51%) | 32 (91%) |
| Shock                                                       | 13 (14%) | 9 (16%)  | 4 (11%)  |
| Neurologic                                                  | 10 (11%) | 9 (16%)  | 1 (3%)   |
| Procedural                                                  | 25 (27%) | 21 (37%) | 4 (11%)  |
| Use of catecholamine infusion peri-intubation               | 16 (17%) | 12 (21%) | 4 (11%)  |
| Hemodynamic TIAE or SpO <sub>2</sub> <80% during intubation | 15 (16%) | 8 (14%)  | 7 (20%)  |

<sup>a</sup>Categories are not mutually exclusive. Encounters with multiple sites of GVHD had each site counted.

<sup>b</sup>Indications are not mutually exclusive. Encounters with multiple indications for intubation had all indications listed

HCT: hematopoietic stem cell transplant; BLPAP: bi-level positive airway pressure; IQR: interquartile range; PSCT: peripheral stem cell transplant; BM: bone marrow; UCB: umbilical cord blood; GVHD: graft versus host disease; PCCM: pediatric critical care medicine; EM: emergency medicine; APP: advanced practice provider (includes nurse practitioners and hospitalists); LMA: laryngeal mask airway; FO: fiber optic

Supplemental Table D: Characteristics of HCT patients who are or are not treated with non-invasive positive pressure ventilation (NIPPV) prior to intubation

| Characteristic                                   | All HCT patients<br>N=92 | Without NIPPV<br>n=38 | With NIPPV<br>n=54 |
|--------------------------------------------------|--------------------------|-----------------------|--------------------|
| Age category                                     |                          |                       |                    |
| < 1 year                                         | 7 (8%)                   | 4 (11%)               | 3 (6%)             |
| 1-7 year                                         | 36 (39%)                 | 18 (47%)              | 18 (33%)           |
| 8-17 year                                        | 39 (42%)                 | 14 (37%)              | 25 (46%)           |
| ≥18 year                                         | 10 (11%)                 | 2 (5%)                | 8 (15%)            |
| Male sex (count, %)                              | 53 (58%)                 | 21 (55%)              | 32 (59%)           |
| Weight in kg, median (IQR)                       | 25.0 (12.8-54.7)         | 19.8 (11.1-50.2)      | 36.6 (17.6-59.6)   |
| Difficult airway features                        | 21 (23%)                 | 11 (29%)              | 10 (19%)           |
| Allogeneic transplant                            | 82 (89%)                 | 33 (87%)              | 49 (91%)           |
| Transplant source                                |                          |                       |                    |
| PSCT                                             | 38 (46%)                 | 14 (42%)              | 24 (50%)           |
| BM                                               | 36 (44%)                 | 16 (48%)              | 20 (41%)           |
| UCB                                              | 8 (10%)                  | 3 (9%)                | 5 (10%)            |
| GVHD                                             | 28 (34%)                 | 8 (24%)               | 20 (41%)           |
| Organ system affected by GVHD <sup>a</sup>       |                          |                       |                    |
| Skin                                             | 22 (24%)                 | 8 (21%)               | 14 (26%)           |
| Liver                                            | 5 (5%)                   | 0 (0%)                | 5 (9%)             |
| Gut                                              | 15 (16%)                 | 4 (11%)               | 11 (20%)           |
| Other                                            | 4 (4%)                   | 1 (3%)                | 3 (6%)             |
| Days from transplant to intubation, median (IQR) | 101 (36-367)             | 96 (36-360)           | 105 (36-374)       |
| Provider type                                    |                          |                       |                    |
| PCCM Attending                                   | 5 (5%)                   | 2 (5%)                | 3 (6%)             |
| PCCM/EM fellow                                   | 76 (83%)                 | 30 (79%)              | 46 (85%)           |
| Peds/EM resident                                 | 1 (1%)                   | 1 (3%)                | 0 (0%)             |
| APP                                              | 5 (5%)                   | 2 (5%)                | 3 (6%)             |
| Subspecialist/Other                              | 5 (5%)                   | 3 (8%)                | 2 (4%)             |
| Device                                           |                          |                       |                    |
| Direct laryngoscope                              | 44 (48%)                 | 18 (47%)              | 26 (48%)           |
| Video laryngoscope                               | 47 (51%)                 | 19 (50%)              | 28 (52%)           |
| LMA/FO/Other                                     | 1 (1%)                   | 1 (3%)                | 0 (0%)             |

|                                                             |          |          |          |
|-------------------------------------------------------------|----------|----------|----------|
| Number of attempts, median (IQR)                            | 1 (1-1)  | 1 (1-1)  | 1 (1-1)  |
| Use of apneic oxygenation                                   | 42 (46%) | 16 (42%) | 26 (48%) |
| Indication for intubation <sup>b</sup>                      |          |          |          |
| Respiratory                                                 | 61 (66%) | 18 (47%) | 43 (80%) |
| Shock                                                       | 13 (14%) | 5 (13%)  | 8 (15%)  |
| Neurologic                                                  | 10 (11%) | 9 (24%)  | 1 (2%)   |
| Procedural                                                  | 25 (27%) | 14 (37%) | 11 (20%) |
| Use of catecholamine infusion peri-intubation               | 16 (17%) | 5 (13%)  | 11 (20%) |
| Hemodynamic TIAE or SpO <sub>2</sub> <80% during intubation | 15 (16%) | 5 (13%)  | 10 (19%) |

<sup>a</sup>Categories are not mutually exclusive. Encounters with multiple sites of GVHD had each site counted.

<sup>b</sup>Indications are not mutually exclusive. Encounters with multiple indications for intubation had all indications listed

HCT: hematopoietic stem cell transplant; BLPAP: bi-level positive airway pressure; IQR: interquartile range; PSCT: peripheral stem cell transplant; BM: bone marrow; UCB: umbilical cord blood; GVHD: graft versus host disease; PCCM: pediatric critical care medicine; EM: emergency medicine; APP: advanced practice provider (includes nurse practitioners and hospitalists); LMA: laryngeal mask airway; FO: fiber optic
